# Knockout of *myoc* reveals the role of myocilin in zebrafish sex determination associated with Wnt signalling downregulation

Raquel Atienzar-Aroca<sup>1,2,3</sup>, José-Daniel Aroca-Aguilar<sup>1,2,3</sup>, Susana Alexandre-Moreno<sup>1,2,3</sup>,  
Jesús-José Ferre-Fernández<sup>1,2,3</sup>, Juan-Manuel Bonet-Fernández<sup>1,2,3</sup>, María-José  
Cabañero-Varela<sup>1,2,3</sup> and Julio Escribano<sup>1,2,3,\*</sup>

<sup>1</sup>Área de Genética, Facultad de Medicina de Albacete, Universidad de Castilla-La Mancha, Albacete, Spain

<sup>2</sup>Instituto de Investigación en Discapacidades Neurológicas (IDINE), Universidad de Castilla-La Mancha, Albacete, Spain

<sup>3</sup>Cooperative Research Network on Age-Related Ocular Pathology, Visual and Life Quality (OFTARED), Instituto de Salud Carlos III, Madrid, Spain

\*Corresponding autor: Julio Escribano, PhD, Área de Genética, Facultad de Medicina, Avda. de Almansa, 14, 02006-Albacete, Spain. E-Mail: julio.escribano@uclm.es

Myocilin is a secreted glycoprotein with a poorly understood biological function and it is mainly known for its association with glaucoma. To explore the normal role of this protein *in vivo* we developed a *myoc* knockout (KO) zebrafish line using CRISPR/Cas9 genome editing. This line carries a homozygous variant (c.236\_239delinsAAAGGGGAAGGGGA) that is predicted to result in a loss-of-function of the protein because of a premature termination codon p.(V75EfsX60) that resulted in a significant reduction of *myoc* mRNA levels. Immunohistochemistry showed the presence of myocilin in embryonic (96 hours post-fertilization) anterior segment eye structures and caudal muscles. The protein was also detected in different adult ocular and non-ocular tissues. No gross macroscopic or microscopic alterations were identified in the KO zebrafish, but remarkably, we observed absence of females among the KO animals and apoptosis in the immature juvenile gonad (28 dpf) of these animals. Transcriptomic analysis showed that adult KO males overexpressed key genes involved in male sex determination and presented differentially expressed Wnt signalling genes. These results show that myocilin is required for ovary differentiation in zebrafish and provide *in vivo* support for the role of myocilin as a Wnt signalling pathway modulator. In summary, this *myoc* KO zebrafish line can be useful to investigate the elusive function of this protein, and it provides evidence for the unexpected function of myocilin as a key factor in zebrafish sex determination.

## Introduction

Myocilin is a 55–57 kDa extracellular glycoprotein with an enigmatic function that is primarily known for its relationship with glaucoma<sup>1</sup>, which is a progressive and irreversible optic neuropathy that is caused by apoptosis of retinal ganglion cells, and it is generally associated with elevated intraocular pressure<sup>2</sup>. This protein was identified in human trabecular meshwork cell cultures that were treated with glucocorticoids and it was initially called Trabecular Meshwork Inducible Glucocorticoid Response (TIGR)<sup>3</sup>. It was later called myocilin because of its amino acid sequence similarity with myosin<sup>4</sup>. The transcripts encoding myocilin were initially discovered in the ciliary body<sup>5,6</sup> and then in photoreceptor cells<sup>4</sup>. The gene is also expressed in other tissues of the ocular anterior segment such as the iris and the trabecular meshwork (TM)<sup>6-9</sup>. The protein is present in the aqueous humor<sup>10,11</sup>, where it forms aggregates of 120–180 kDa<sup>12</sup>, which are linked partially by disulphide bonds<sup>13</sup>. In addition, *MYOC* expression has been detected in non-ocular tissues such as skeletal and cardiac muscles<sup>6</sup>, blood plasma, leukocytes and lymphoid tissues<sup>14</sup>. The protein has been reported to be secreted in association with exosomes in TM cells<sup>15,16</sup>.

Although important structural properties of myocilin have been unveiled, they have not provided a definitive clue to elucidate its normal function. Thus, we know that the N-terminal region of myocilin is composed of two coiled-coil domains<sup>17,18</sup> with a leucine-zipper motif<sup>6</sup> in the second coiled-coil, which are involved in myocilin self-aggregation<sup>12</sup>. The N-terminal half is connected to the C-terminal part of the protein by a central region that contains a calpain II proteolytic site that is cleaved intracellularly<sup>11,19</sup>. The C-terminal region is homologous to olfactomedin<sup>6</sup>, and identifies

this protein as a member of the olfactomedin protein family. This family comprises a group of glycoproteins that are known to be involved in early development and functional organisation of the nervous system as well as haematopoiesis. Olfactomedin domains appear to facilitate protein–protein interactions, intercellular interactions, and cell adhesion<sup>20</sup>. The olfactomedin domain of myocilin folds like a globular five-bladed  $\beta$ -propeller<sup>21</sup> and contains most glaucoma-causing variants<sup>6</sup>. The quaternary structure of myocilin is composed of a Y-shaped dimer-of-dimers in which the N-terminal coiled-coil region forms a tetrameric stem that is linked by disulphide bonds, and it is connected through the linker region to two pairs of olfactomedin domains<sup>22</sup>. We have proposed that extracellular myocilin may form a dynamic extracellular network that is composed of myocilin homoaggregates which may bind through the olfactomedin domain with matricellular proteins such as SPARC and hevin, as well as fibronectin, which suggests that myocilin might function as a putative matricellular protein<sup>23,24</sup>.

Myocilin and other olfactomedin family members, such as photomedin-1<sup>25</sup>, gliomedin<sup>26</sup> and latrophilin<sup>27</sup> are proteolytically cleaved, splitting the proteins in two fragments. Though the role of this process is not completely understood, we have proposed that it regulates molecular interactions of this protein<sup>23,24</sup>. We have shown that it is affected by the extracellular concentration of bicarbonate<sup>28</sup>. C-terminal myocilin fragments have been identified in different ocular tissues and biological fluids such as the ciliary body, aqueous humor (AH)<sup>11</sup> and trabecular meshwork<sup>9</sup>, indicating that the proteolytic cleavage of this protein also occurs *in vivo* and that it may be important in regulating its biological function. Interestingly, recombinant myocilin has been reported to modulate Wnt signalling in cell culture, suggesting that this pathway might also participate in its normal function<sup>29,30</sup>. Myocilin has anti-adhesive properties

on trabecular meshwork cells<sup>31,32</sup> and reduces the adhesion of human circulating leukocytes to cultured endothelial cell monolayers<sup>14</sup>.

In this study, we developed a *myoc* knockout (KO) zebrafish model to explore the biological role of this interesting protein. We found that while this line did not show apparent morphological anomalies, unexpectedly, all KO animals were males, indicating that myocilin is required for ovary differentiation, acting as a novel key protein involved in sex determination in domesticated zebrafish. To the best of our knowledge, our results also provide the first *in vivo* evidence of myocilin as a Wnt signalling pathway modulator.

## Results

**Generation of the KO *myoc* line in zebrafish using CRISPR/cas9.** To better understand the biological function of *MYOC* in vivo, we used the zebrafish as an animal model. As mentioned above, the human *MYOC* gene consists of three exons and it is located on the long arm of chromosome 1, whereas the orthologue zebrafish gene has four exons and it is located on chromosome 20 (Supplementary Fig. S1A online). Comparison of DNA sequences showed 37.2% nucleotide identity in the coding regions of the human and zebrafish genes. The corresponding proteins present conserved olfactomedin domains with 45% amino acid sequence identity (Supplementary Fig. S1B online). The N-terminal coiled-coils that are present in the human protein were not predicted in zebrafish myocilin.

To disrupt this gene using the CRISPR/cas9 genome editing, we designed a CRISPR RNA (crRNA) targeting exon 1 (Fig. 1A). The ribonucleoprotein (RNP) complexes [crRNAs/trans-activating CRISPR RNA (tracrRNA) and Cas9 protein] were microinjected into the animal pole of AB zebrafish embryos at the one-cell stage of development (Fig. 1B). The injected embryos (F0) were raised to adulthood and screened using polyacrylamide gel electrophoresis (PAGE) and Sanger sequencing for the presence of germline transmitted *myoc* deletions. Sanger sequencing identified mutant mosaic fishes transmitting an indel variant (c.236\_239delinsAAAGGGGAAGGGGA), which was predicted to cause a frameshift in the coding region and a premature termination codon p.(V75EfsX60) (Fig. 1D). These mosaics were selected as F0 founders and backcrossed with wild-type AB zebrafish to segregate off-targets, and the offspring (F1) was genotyped by PAGE (Fig. 1B). Mutant F1 heterozygotes were outbred again with

wild-type AB to further segregate off-target mutations in the F2 generation (Fig. 1B).

Finally, F3 homozygous *myoc* KO fishes were obtained through inbreeding F2 heterozygotes. F3 genotyping by PAGE (Fig. 1C) and Sanger sequencing (Fig. 1D) showed agreement of the proportions of the three genotypes with the expected Mendelian ratios, indicating that *myoc* disruption does not affect zebrafish fertility and viability.

The mutation is predicted to result in degradation of the *myoc* mRNA by the non-sense mediated decay (NMD) pathway<sup>33</sup>, leading to a loss-of-function (LoF) of the protein. To confirm this hypothesis, *myoc* mRNA levels were analysed by quantitative reverse transcription PCR (qRT-PCR) in three pools of 15 larvae each per genotype. We observed a reduction of mRNA levels in heterozygous (+/-) and mutant homozygous (-/- or KO) larvae of approximately 50% and 80%, respectively, with respect to the value of their wild-type (+/+) littermates (Fig. 1E). These results were in accordance with our hypothesis, and although there was a low level of residual mutant mRNA in the KO larvae, it would be likely translated into a non-functional truncated protein that contains only 74 normal amino acids. All these data support that the generated mutation produces a complete *myoc* LoF.

### **Expression of *myoc* and phenotypic characterisation of the KO zebrafish**

**line.** To the best of our knowledge, myocilin expression has not been described in zebrafish. To investigate the presence of this protein in zebrafish by immunohistochemistry we used a chicken anti-myocilin antibody that was raised against a N-terminal peptide of the human protein (TNT antibody), and we took advantage of the KO zebrafish line as a unique negative control to assess the specificity

of the signals. Fluorescent whole mount immunohistochemistry (FWIHC) confocal three-dimensional reconstruction of 96 hpf embryos revealed positive immunolabeling in the lens epithelium and intercellular spaces on both the external surface of the optic cup and dorsoposterior and ventral periocular tissues, which probably corresponds to the periocular mesenchyme (Fig. 2A–C and supplementary video S1). Positive immunolabeling was also detected apparently in the extracellular space of the yolk surface (Fig. 3A–C and supplementary video S2) and in caudal muscular tissue (Fig. 4A–C). These immunosignals were reduced in heterozygous embryos (Fig. 2D–F, Fig. 3D–F and Fig. 4D–F), and they were undetectable in  $-/-$  embryos (Fig. 2G–I, Fig. 3G–I and Fig. 4G–I), which supports their specificity. The absence of green signals in the control sections that were incubated with preimmune antibody also supported the specificity of the immunoreactivity (Supplementary Fig. S3 online). Next, we investigated the presence of myocilin in adult zebrafish ocular tissues using immunohistochemistry. We detected positive immunoreactivity in the non-pigmented ciliary epithelium, blood vessels and stroma of the iris (Fig. 5A), corneal epithelium (Fig. 5B), and retinal ganglion cells (Fig. 5C and D). These signals were absent in  $-/-$  zebrafish (Fig. 5E–G), as well as in samples treated with the preimmune antibody or blocked with the antigenic peptide (Supplementary Fig. S4 online). This also supports their specificity.

To investigate the presence of myocilin in representative non-ocular adult tissues we selected skeletal muscle (pharyngeal muscle) and the digestive (intestinal bulb, and middle intestine) and reproductive (testis and ovary) systems. Analysis of tissue sections revealed myocilin immunoreactivity in the periphery of pharyngeal muscular fibres (Fig. 6A and B). In the dilated portion of the proximal intestine, i.e., the intestinal bulb, we observed immunolabeling in the enterocyte apical side (Fig. 6C and



D), and in contrast, epithelial cells of the middle intestine were intracellularly stained (Fig. 6E and F), showing distinctive brush border staining (Fig. 6E and F, arrows). These immunosignals were almost absent in the  $-/-$  (Fig. 6G-L), and in additional negative controls, i.e., the preimmune antibody (Supplementary Fig. S5A–C online) and the competitive assay with the immunising peptide (Supplementary Fig. S5D-F online). For the reproductive system, positive immunolabeling was observed in the follicular epithelium of the ovary and cortical alveoli of vitellogenic oocytes (Fig. 7A and B), as well as in the seminiferous epithelium, but not in sperm (Fig. 7C and D). As will be described in the next section, the absence of  $-/-$  females precluded their use as negative immunohistochemistry controls. However, the immunosignal was absent in the testis of  $-/-$  animals (Fig. 7E and F), and significantly reduced in tissue sections of ovaries that were either treated with the preimmune antibody (Supplementary Fig. S6A online) or blocked with the antigenic peptide (Supplementary Fig. S6B online), indicating that the immunolabeling is specific.

Because of the relationship between *myocilin* and glaucoma, the eyes were the principal focus of our phenotypic analysis. External morphological examination of both embryo (96 hpf) and adult (7 months) *myoc* KO zebrafish did not reveal any significant difference between the eyes and head of wild-type and KO zebrafish (Supplementary Fig. S7 online). Similarly, comparison of hematoxylin–eosin stained tissue sections between  $+/+$  and  $-/-$  zebrafish embryos (96 hpf) showed no evident head (Supplementary Fig. S8A and C online) or eye (Supplementary Fig. S8B and D online) differences. The dorsal and ventral anterior segment structures of adult (7 months)  $-/-$  zebrafish were also similar to those of  $+/+$  animals (Supplementary Fig. S9A and B online), although, an apparently increased folding of the anterior retina was observed in

mutant zebrafish (Supplementary Fig. S9D and E online, arrow), compared to wild-type animals (Supplementary Fig. S9A and B online). Finally, no gross alterations were observed in the retina of  $-/-$  zebrafish (Supplementary Fig. S9C and F online). These data show that under our experimental conditions, *myoc* KO zebrafish are phenotypically indistinguishable from wild-type animals.

Throughout the breeding process we observed a consistent absence of females among  $-/-$  zebrafish. To confirm this observation, a total of eight different heterozygote sister-brother mating from three consecutive generations (F3 to F5) were performed. The offspring from each mating was raised to adulthood (3 months), genotyped using PAGE, and the male/female ratio corresponding to each genotype was calculated based on examination of multiple external dimorphic phenotypes, including body shape, anal fin coloration, and presence or absence of a genital papilla<sup>34</sup>. We observed a significant decrease in female proportion that correlated with the KO genotype, i.e., approximately 41% of  $+/+$  animals were female, whereas this percentage was reduced to 25 and 0% in  $+/-$  and  $-/-$  zebrafish, respectively (Fig. 8A). These results indicate that myocilin might play a key role in sex determination in zebrafish. As a control to evaluate the possible lethality that might be associated with the KO allele, we analysed genotype and survival proportions in the offspring of inbred *myoc* heterozygotes. The genotype proportions did not differ significantly from the expected Mendelian values ( $+/+$  25%,  $+/-$  50% and  $-/-$  25%,  $p > 0.05$ ) (Fig. 8B) and survival at 24 and 96 hpf was similar to that of embryos that were obtained from wild-type progenitors ( $p > 0.05$ ) (Fig. 8C). These results indicate that there is not a lethality associated with the KO genotypes, ruling out that the sex proportion observed in KO animals is biased by sex-dependent lethality that is associated with a specific mutant *myoc* genotype. Moreover, 11 randomly selected  $-/-$

male siblings were mated with +/+ females, and all of them fertilised eggs after spontaneous spawning, confirming the fertility and sex of these animals and ruling out errors in sex classification.

### **Histology and terminal dUTP Nick-End Labeling (TUNEL) of the immature gonad of the *myoc* KO zebrafish line.**

Consecutive tissue sections were employed for histological, immunohistochemical, and TUNEL analyses of the immature zebrafish gonad (eight dpf and 28 dpf) in eight individuals (four +/+ and four -/-). Immunodetection of the germ cell marker vasa<sup>35</sup> on section two of eight dpf gonads revealed the ventrolateral position of wild type germinal tissue with respect to the swim bladder (Fig. 9A). Vasa positive cells showed round and large nuclei with sharp cytoplasmic immunostaining (Fig. 9B). The germinal tissue of -/- larvae presented similar location and structure (Fig. 9E and F), showing that at this developmental stage *myoc* LoF does not affect gonadal differentiation at the tissular level. Myocilin Immunodetection on tissue section one showed positive immunoreactivity in a position equivalent to that revealed by the gonadal marker vasa (Fig. 9C), with labelling of the cytoplasm of germinal-like cells, which were characterized by large and round nucleus (Fig. 9D, arrows). The anti-myocilin antibody also labelled peripheral cells with smaller nucleus (Fig. 9D, arrowheads). These signals were absent in KO larvae (Supplementary Fig. S11G and H online) and in negative controls (Supplementary Fig. S11A and B online). Altogether, these data show that myocilin is expressed in zebrafish germinal cells.

Next, we examined the histology of the juvenile ovary-to-testis-transforming gonad (28 dpf) by haematoxylin and eosin staining on tissue section one (Supplementary Fig. S10A and C online). The immature gonads from +/+ and -/- zebrafish were apparently normal, showing primordial germinal-like cells with large nuclei and prominent nucleoli (Supplementary Fig. S10 B and D online, arrows). Again, these results indicate that *myoc* LoF did not alter gonadal development, at least at the tissular level. Vasa immunostaining on tissue section two confirmed the presence of the juvenile gonad in the ventral side of the swim bladder and above the intestine of both +/+ (Fig. 9I and J) and -/- (Fig. 9M and N). Myocilin immunodetection on tissue section three revealed some positive cells in +/+ juvenile gonads (Fig. 9K), although its proportion was apparently lower than that observed in the larval gonad (Fig. 9C and D). As expected, myocilin immunoreactivity was absent in -/- gonadal tissue (Fig. 9O), indicating that the signal was specific. Given that oocyte apoptosis participates in the mechanism of testicular and ovarian differentiation in the larval-juvenile zebrafish transition<sup>36</sup>, we also investigated gonadal apoptosis in KO animals using a TUNEL assay on tissue section four. No positive cells were observed in none of the +/+ gonads obtained from four individuals (Fig. 9L). In contrast, the germinal tissue of -/- animals showed many TUNEL positive primordial germ-like cells, characterized by large and round nuclei (Fig. 9P, arrows). Small nucleated cells that were located in the outer intestinal wall, were also positive for TUNEL staining (Fig. 9P, arrowheads). The absence of labelling in the respective negative controls (tissue sections five to seven) supported the specificity of the results (Supplementary Fig. S11C-E online).

## Comparison of transcriptomic profiles of adult male $-/-$ and $+/+$ zebrafish.

To investigate differences in gene expression profiles associated with *myoc* LoF we performed comparative whole transcriptome sequencing of adult male *myoc* KO and adult male wild type zebrafish (2.5 months). Mutant and wild type zebrafish siblings were obtained by inbreeding heterozygous F4 progenitors. To minimize the effect of individual variability, we pooled 3 fishes in each sample and two independent biological replicas of each experimental group were analysed.

A total of 10168 genes with zero counts across all samples were excluded from the study, leaving 29819 genes for further analysis. The similarity between samples, evaluated using Pearson's coefficient, indicated that the replicas were similar (Supplementary Fig. S12 online). Hierarchical clustering analysis based on the criteria of fold change  $\geq 2$  and raw p-value  $< 0.05$  for the comparison male KO vs. male wild type of differentially expressed gene (DEG) patterns in the experimental replicas revealed similar clusters of DEGs between the two replicas of each experimental group, indicating that most identified gene expression patterns were reproducible (Supplementary Fig. S13 online).

We identified an average of 6184 genes significantly upregulated (fold change  $> 2$  and raw  $p < 0.05$ ) in the four comparisons (*i.e.*, KO1 vs. WT1, KO1 vs. WT2, KO2 vs. WT1 and KO2 vs. WT2). Similarly, an average of 6023 genes were significantly down regulated (fold change  $< -2$  and raw  $p < 0.05$ ) in the four comparisons (Supplementary Fig. S14 online). Genes overrepresented in different biological processes, were identified by a KEGG enrichment analysis. We selected the top-20 regulated pathways that can be altered (absolute fold change  $> 2$ ) in the absence of *myoc* activity (Supplementary Fig.

S15 online). All pathways were significantly different in the four comparisons. Fourteen were metabolic related pathways and six pathways were related with genetic information processing (Supplementary Fig. S15 online).

Complementary gene ontology functional enrichment analysis in the group of top-50 upregulated genes using ShinyGO<sup>37</sup> showed significant DEGs in several categories including biosynthetic and catabolic processes and regulation of metabolic processes (Supplementary Table S3 online), in accordance with the general KEEG analysis. In addition, categories such as developmental processes, anatomical structure development and reproduction were also significantly enriched in this group. On the other hand, the cluster of top-50 down regulated genes showed significant DEGs in categories mainly related with biosynthetic processes, reproduction, meiosis, SMAD signal transduction and cell cycle (Supplementary Table S4 online). To validate the transcriptome results by qRT-PCR we selected the two most upregulated (*tuba7l* and *irg1l*) and the two most downregulated (*plpp4* and *grik3*). In addition, nine selected DEGs with absolute fold change values greater than 2.0, were also re-assessed by qRT-PCR. This group included five representative genes known to play key roles in zebrafish sexual differentiation (*dmrt1*, *amh*, *sycp3*, *cyp11a1*, and *star*) and four Wnt genes that were also underexpressed in the *myoc* KO transcriptome (*dkk1a*, *lef1*, *ctnnbip1*, and *dv/3a*). The Wnt genes were selected because of the role of Wnt signaling in zebrafish sex differentiation and the proposed role of myocilin as a Wnt modulator. The qRT-PCR results showed a good correlation with the transcriptome data and confirmed most expression differences, except that detected for *grik3* (Fig. 10A and D and Supplementary Table S5 online). The higher sensitivity of qRT-PCR compared with RNA-Seq and the technical differences between the two procedures may explain this

discrepancy and the differences observed in absolute FC values between the two techniques. In addition, we found significant downregulated expression in the KO transcriptome of two additional relevant genes involved in these processes: *ctnnb2* (fold change: -3.6; p-value: 1.0E-11), which encodes beta-catenin 2, and *cyp19a1* (fold change: -18.1; p-value: 2.5 E-07), that is proposed to be a key player in ovary differentiation<sup>38</sup>. As expected *myoc* expression was found significantly downregulated in the KO animals (fold change: -4.7; p-value: 1.2 E18).

## Discussion

Over the past two decades myocilin research has provided insight into the structure, expression and association with glaucoma of this protein. However, we still lack a clear understanding of its biological function and how mutant myocilin underlies glaucoma pathogenesis. Thus, these issues remain challenging scientific questions. To advance our knowledge on myocilin physiology, we generated a null *myoc* genotype in the zebrafish and assessed the resulting phenotypes. The obtained KO line is also a valuable control to investigate the specific histological localisation of myocilin by immunohistochemistry. The lack of well characterised anti-myocilin antibodies and suitable controls has hindered immunodetection of this protein and has provided controversial reports on myocilin expression. Our immunohistochemical analyses, which to the best of our knowledge, constitute the first report on myocilin expression in zebrafish, revealed the specific presence of myocilin in the eye and caudal muscles of zebrafish embryos (96 hpf). Myocilin was also detected in the secretory NPE cells of the adult zebrafish eye, mimicking the expression of the human gene<sup>8,24</sup>. These results also suggest that, similar to its human counterpart, the zebrafish protein may be secreted into the aqueous humour<sup>10,11</sup>. In addition, zebrafish myocilin was detected in the iris stroma, the corneal endothelium and the retinal ganglion cell layer, again resembling the localisation of the human protein<sup>8</sup>. However, and in contrast to humans, myocilin was almost undetectable in the zebrafish corneal epithelium<sup>8</sup>. Overall, parallels in myocilin expression between these two organisms indicate that zebrafish can be used as a model to study the role of myocilin in ocular physiology. In addition, myocilin expression was observed surrounding skeletal muscle cells in pharyngeal muscles, and



intracellularly in epithelial cells of the middle intestine, with intense localisation in the brush border.

Consistent with our results, expression of myocilin at the mRNA level has been detected in the human skeletal muscle<sup>6,39</sup> and small intestine<sup>40</sup>. It is interesting that the myocilin-related protein olfactomedin-4, is present in intestinal stem cells and is apparently involved in mucosal defence<sup>41</sup>. These results suggest that myocilin, as a secreted protein, might play a role in the muscular and small intestinal extracellular matrix, although further work is required to reveal the role of myocilin in these tissues. The presence of myocilin in adult male and female gonads (i.e., follicular epithelium, cortical alveoli of vitellogenic oocytes, and seminiferous tubule cells) indicates that it may play a role in gamete production in zebrafish, which is a hitherto unsuspected function. In addition, the expression of myocilin in undifferentiated germinal tissue suggests that this protein may play a role in sex differentiation as will be discussed later.

Phenotype evaluation of the KO zebrafish showed neither gross macroscopic nor histological alterations in different organs that express *myoc*, such as the eye, skeletal muscle, brain, and digestive apparatus. These results indicate that *myoc* is not essential for normal body and tissue morphology, at least under normal conditions. Consistent with this conclusion, a previous report found that mouse *Myoc* is not required for either viability or for normal ocular morphology<sup>42</sup>. Moreover, and consistent with these results, it has been described that the homozygous premature termination codon p.(Arg46X) of human *MYOC*, a likely null variant, did not result in any identifiable pathogenic phenotype in a 77-year-old woman<sup>43</sup>. The apparently normal phenotype that is associated with *MYOC* LoF in different species, may result from a functional redundancy of other related gene products, which at least under normal conditions,

might balance the functional lack of myocilin in most *myoc*-expressing tissues. However, one striking finding of our study was the lack of KO female zebrafish, suggesting that this gene is required for female zebrafish sex determination. Wild zebrafish strains use a ZZ/ZW genetic sex determination mechanism, with the major sex locus located on chromosome 4. This genetic sex determinant seems to have been lost in domesticated strains, which are widely used in the laboratory<sup>44</sup>. Rather than a single master gene, multiple genes and possible weak secondary environmental factors have been proposed to play a role as sex determining factors in zebrafish research strains<sup>45</sup>. Environmental factors that are known to influence zebrafish sex include temperature, density, hormones, food and hypoxia<sup>45</sup>. All these factors were controlled and homogeneous in our experimental crosses, making it highly unlikely that they biased the observed sex ratio. Moreover, none of the several *loci* identified in zebrafish that appeared to influence sex ratios in a strain-dependent manner<sup>46-49</sup>, were located on the *myoc locus*, at chromosome 20. Thus, these data indicate that *myoc* may be a novel gene that is involved in zebrafish sex determination. This idea is supported by the expression of myocilin in undifferentiated germinal tissue (eight dpf) and in the immature juvenile gonad (28 dpf). In addition, the fact that the absence of this protein in the KO zebrafish results in only males with normal testis, indicates that this protein is required for ovary differentiation, although the presence of myocilin in wild type zebrafish does not block ovary development in all individuals, suggesting that additional factors might modulate the role of myocilin as a pro-female factor. Further studies are required to elucidate this issue.

To characterize the KO phenotype at the gene expression level we performed a transcriptomic analysis, which revealed many DEGs, indicating the existence of marked

differences between adult males, associated with the *myoc* KO genotype. The top-20 significant KEEG pathways were grouped into two broad functional categories, metabolic and genetic information processing-related. This likely identifies broad molecular processes involved in the male-biased sex ratio observed in the KO animals. Interestingly, detailed functional enrichment evaluation, focused on the top-50-up and -down DEGs, identified significant categories related with reproduction, meiosis, anatomical structure and development, indicating that these processes participate in the male-biased proportion associated with the null *myoc* genotype. Alpha-tubulin genes *tuba7l* and *tuba4l* were the most over- and under-expressed genes in *myoc* KO males, respectively. In accordance with our results *tuba7l* is overrepresented in testes of sexually mature zebrafish<sup>50</sup> while *tuba4l* is the most downregulated gene in male gonads of zebrafish masculinized by treatment with high temperature<sup>50,51</sup>.

Interestingly, we identified several highly DEGs in male zebrafish *myoc* KO that play key roles in male sexual differentiation, including *dmrt1*, *amh*, *symp3*, *cyp11a1*, *cyp11c1* and *star*. *Dmrt1* regulates *amh* and *foxl2* and is necessary for zebrafish male sexual development<sup>52</sup>. The *amh* gene encodes the anti-Müllerian hormone, a member of the TGF-beta superfamily of growth factors. This hormone is upregulated in testis of sexually mature zebrafish<sup>50</sup> and promotes male development, although is not essential for this process<sup>53</sup>. *Symp* is a pro-male gene, and a spermatocyte marker for meiotic cells<sup>54</sup>. *Cyp11a1* and *star* are two steroidogenic genes encoding rate limiting steps in steroid biogenesis androgen production<sup>55,56</sup>. In addition, *cyp11c1* is required for juvenile ovary-to-testis transition, Leydig cell development, and spermatogenesis in males because it participates in the synthesis of the major natural androgen in teleost fish (11-ketotestosterone)<sup>57,58</sup>. In accordance with our results, some of these genes have also

been described to be upregulated (*dmrt1*, *amh*, *sycp3*, *cyp11c1* and *star*) or downregulated (*cyp11a1*) in male gonads of zebrafish masculinized by treatment with elevated water temperature (35 °C)<sup>51</sup>. Overall, these data reveal that *myoc* LoF results in over-expression of genes required for male development (Fig. 11A).

The zebrafish gonad, like the mammalian gonad, is bipotential before sex determination (<10 dpf), and it is composed of a mixture of male- and female-like cells<sup>59,60</sup>. Sex differences begin to be apparent when the number of oocytes tend to increase in females (20-30 dpf)<sup>61</sup>. This process is regulated by the canonical Wnt/beta-catenin signalling, which acts as a pro-female pathway<sup>62</sup>, and inhibition of this pathway results in male-biased sex ratios. Remarkably, and in accordance with this mechanism, we found that several Wnt signalling genes (*dvl3a*, *lef1*, *ctnnb2*, and *ctnnbip1*) were under-expressed in KO male zebrafish. *Dvl3a* gene product is required for activation of zygotic Wnt/beta-catenin signalling and Wnt/planar cell polarity pathway<sup>63</sup>. The transcription factor *left1* associates with beta-catenin to activate gene expression<sup>64</sup> and *ctnnb2* encodes beta-catenin 2, which is the key transcription factor of this signalling pathway. Under-expression of *ctnnbip1*, a repressor of beta-catenin-TCF-4-mediated transactivation<sup>65</sup>, might contribute to balance Wnt pathway attenuation, although the actual meaning of this expression change remains to be investigated. In addition, the Wnt secreted inhibitor *dkk1a*<sup>66</sup> was overexpressed, which may contribute to Wnt signalling depression. In accordance with our results, it has been reported that myocilin modulates the Wnt signalling pathway<sup>29,30</sup> and that it interacts with two secreted inhibitors of Wnt signalling (Frizzled-related proteins 1 and 3), and with various Frizzled receptors (Fzd1, Fzd7, and Fzd10)<sup>29</sup>. On the other hand, inhibition of Wnt/beta-catenin signalling results in an increased proportion of zebrafish males and downregulated

expression of *cyp19a1a* and *lef1* genes<sup>62</sup>. Overall, these data support that *myoc* LoF downregulates the Wnt signalling pro-female pathway<sup>62,67</sup>, inhibiting ovary differentiation and leading to testis formation. Moreover, it is known that beta-catenin is an essential transcriptional regulator of aromatase<sup>68</sup>, a gene proposed to play a key role in directing ovarian differentiation and development<sup>38</sup>. In accordance with this fact, *cyp19a1* was also under-expressed in the KO zebrafish transcriptome. Therefore, decreased expression of both Wnt signalling pathway and aromatase (*cyp19a1*) associated with myocilin LoF may block ovary differentiation of the juvenile zebrafish gonad, leading to testis development. Wnt signalling also plays a role in sex determination in other teleosts<sup>69,70</sup> and mammals<sup>71</sup>, thus the possible role of myocilin in mammal and human sex determination remains to be investigated.

In conclusion, our results show that the established *myoc* KO zebrafish line is a useful model to investigate the elusive function of this protein, mainly known for its association with glaucoma. In addition, this study provides evidence for a previously unsuspected role of myocilin as a novel protein required for ovary differentiation associated with downregulated gene expression of the Wnt signalling pathway.

## Materials and methods

**Animals.** Wild-type AB zebrafish (*Danio rerio*) were maintained at 28 °C with a 14 h on/10 h off light cycle and were fed a standard diet according to established protocols (Westerfield 2000). Zebrafish embryos were raised at 28 °C in E3 medium (5 mM NaCl; 0.17 mM KCl; 0.33 mM CaCl<sub>2</sub>; 0.33 mM MgSO<sub>4</sub>, and 0.0001 % methylene blue, pH 7.2). Adult fishes and larvae were anesthetized with 0.04% and 0.02% tricaine methanesulfonate (MS222, SIGMA), respectively. All animal husbandry and experiments were approved by the Institutional Animal Research Committee of the University of Castilla-La Mancha (approval number PR-2015-04-10). All zebrafish experiments were performed in accordance with relevant guidelines and regulations set forth by the Institutional Animal Research Committee of the University of Castilla-La Mancha.

**CRISPR/Cas 9 gene editing.** Target selection and crRNA design were performed using custom Alt-R CRISPR-Cas9 guide RNA ([https://eu.idtdna.com/site/order/designtool/index/CRISPR\\_CUSTOM](https://eu.idtdna.com/site/order/designtool/index/CRISPR_CUSTOM), Integrated DNA Technologies). Potential off-target sites and highest on-target activity of crRNAs were assessed with CRISPR-Cas9 guide RNA design checker ([https://eu.idtdna.com/site/order/designtool/index/CRISPR\\_SEQUENCE](https://eu.idtdna.com/site/order/designtool/index/CRISPR_SEQUENCE), Integrated DNA Technologies). TracrRNA and crRNA targeting *myoc* exon 1 (myocE1g1 5'-GGTTGCTCGTCTCGTAGGAGGGG-3'), were purchased from Integrated DNA Technologies. For Cas9/gRNA microinjections, crRNA (36 ng/μl) and tracrRNA (67 ng/μl) were mixed, incubated 5 min at 95 °C and cooled at room temperature to hybridise.

Cas9 protein (Alt-R® CRISPR-Cas9 at 250 ng/μl, IDT) and crRNA/tracrRNA complex were mixed and incubated for 10 min at 37 °C to form the RNP complex. Approximately 3 nl of RNP complex were injected into the animal pole of one-cell stage embryos (50-250 embryos/experiment) using a Femtojet 5247 microinjector (Eppendorf) under a Nikon DS-Ri2 stereomicroscope. As a negative control, embryos were injected with Cas9/tracrRNA and no crRNA.

**Zebrafish DNA extraction.** PCR-ready genomic DNA was isolated from whole zebrafish embryos (24 hours post fertilization, hpf) and from the caudal fin of anesthetized larvae (144 hpf) or adult zebrafish using the HotSHOT method<sup>72</sup>. Briefly, tissue samples were incubated with 20 μl of base solution (25 mM KOH, 0.2 mM EDTA) at 95 °C for 30 min in a thermal cycler (BIORAD C100), then 20 μl of neutralization buffer (40 mM TrisHCl, pH 5) were added.

### **Genotyping of CRISPR/Cas9-induced mutations by PAGE and Sanger**

**sequencing.** To characterize the KO mutation, *myoc* exon 1 was amplified by PCR in a thermal cycler (BIORAD C100) using the following conditions: an initial denaturation step at 95 °C for 3 min followed by 35 cycles consisting of denaturation at 95° C for 30 s, annealing at 66 °C for 30 s and extension at 72° C for 30 s. A final extension step at 72° C for 5 min was also included. The primers (*myoc*Fw1, 5'-GGTCGCTGTCAGTACACCTTTAT-3'; *myoc*Rv1, 5'-GCAGGTCCTGAACTTGTCTGTCT-3') were designed using the IDT

PrimerQuest Tool (<https://eu.idtdna.com/Primerquest/Home/Index>, Integrated DNA Technologies) and the PCR products were analysed either by DNA PAGE (8%) or direct Sanger sequencing (Macrogen). PAGE was carried out using the Mini-PROTEAN III gel electrophoresis system (BioRad). After electrophoresis, the gel was stained for 20 min in a EtBr (46067, Fluka) solution (0.5 µg/l).

**qRT-PCR.** qRT-PCR was carried out as previously described<sup>73</sup>. RNA was isolated from pools of 15 zebrafish larvae (144 hpf) or from pools of three adult male zebrafish (2.5 months) using the RNeasy Minikit (Qiagen #74104) and treated with RNase-free DNase I according to the manufacturer's instructions. Purified RNA was used for cDNA synthesis using RevertAid First Strand cDNA Synthesis Kits (Thermo-Scientific #K1622). The expression of *myoc* mRNA or of selected DEGs relative to *ef1α* mRNA was determined using the  $2^{-\Delta\Delta Ct}$  method<sup>74</sup> using the primer pairs described in Supplementary Table S6 online. The PCR analysis was carried out with 1 µl of cDNA as a template in a reaction volume of 10 µl containing 5 µl of Power SYBR Green PCR Master Mix (Thermo-Fisher Scientific) and 200 nM of each primer. Thermocycling conditions included an initial denaturation step at 95° C for 10 min, followed by 40 cycles consisting of 15 s denaturation at 95° C for 60 s and a combined annealing and extension step at 60 °C for 40 s. The PCR products and their dissociation curves were detected with a 7500 Fast real-time PCR system thermal cycler (Thermo-Fisher Scientific). The template cDNA was omitted in the qRT-PCR negative control. qRT-PCR results from three independent experiments were used for calculation of mean expression values in each sample.



**Zebrafish tissue samples.** For histological sections, wild-type and KO myoc zebrafish whole 96 hpf-embryos or adult zebrafish heads were fixed overnight in 4% PFA and cryoprotected two days at 4 °C in 30% sucrose/PBS 0,1 M (Dulbecco, X0515-500C). Thereafter, the embryos and zebrafish heads were embedded in 10% porcine gelatin with 15% sucrose and stored at –80 °C. Serial cryosections (10 µm for embryos and 14 µm for larvae and adult zebrafish) were obtained in a Leica CM3050 S cryostat and stored at –20 °C for further use.

**FWIHC.** Phenylthiourea-treated and fixed embryos (96 hpf) were incubated with a chicken primary antibody (1:50) raised against a N-terminal peptide of the human myocilin protein (anti-TNT)<sup>14</sup> followed by incubation with a Cy2 goat anti-chicken IgY (1:1000) secondary antibody (703-225-155, Jackson ImmunoResearch). Whole embryos were counterstained with DAPI (D8417, Sigma-Aldrich), mounted in low-melting agarose (1%) (8050, Pronadisa) with Fluoroshield Medium (F6182, Sigma-Aldrich) and visualized in an LSM710 Zeiss confocal microscope. Fluorescence emitted by DAPI, the Cy2-conjugated antibody and embryo autofluorescence was registered at the following wavelengths, respectively: 411-464 nm, 490-518 nm and 553-677 nm. Z-stacks were captured with sections spanning the entire embryo and maximum intensity projections and cross-sections of the confocal images were obtained with ZEN software (Zeiss).

**Fluorescence immunohistochemistry.** Fluorescence immunohistochemistry was performed as previously described<sup>75,76</sup>. Briefly, gelatin embedded histological sections of larvae (eight dpf), juvenile (28 dpf) or adult zebrafish (7 months) were treated with immunoblocking solution [10% fetal bovine serum (FBS), 1% DMSO and 1% Triton X-100 in DPBS] at room temperature for 1 h. Gonadal tissue and myocilin were identified using an antibody against the germ cell marker vasa (1:200, GeneTex, GTX128306) or the anti-myocilin (TNT, 1:150) antibody, followed respectively, by incubation with a Cy2-conjugated anti-chicken IgY (1:1000) or anti-rabbit IgG secondary antibody (1:1000). After that, sections were incubated with a secondary antibody, counterstained, mounted and visualized as described earlier. The specificity of the anti-myocilin antibody was evaluated by incubation with the preimmune antibody (1:200) and with a competitive assay using the antigenic peptide at a 1:5 (antibody:peptide) molar ratio.

Apoptotic cell death was evaluated by TUNEL assay using the In-Situ Cell Death Detection Kit, Fluorescein (11684795910, Roche), following the manufacturer's instructions. As a positive control, tissue sections of wild-type zebrafish were incubated for two min with permeation solution (0.1% Tritón-X100, 0.1% sodium citrate) followed by incubation with DNase I solution (3 U/ml DNase, 50 mM Tris-HCl pH 7.5, 1 mg/ml FBS) for 10 min<sup>73</sup>. DNase I treatment was omitted in the negative controls. Samples were stained with DAPI, mounted and visualized as described earlier. At least four animals from each experimental group were used for the microscopy analyses. Four tissue sections per fish were employed for each technique and three random fields per tissue section were examined by a single masked observer.

**Hematoxilin and eosin staining.** Tissue sections, previously washed in PBS, were stained with Harris hematoxylin solution (HHS80, SIGMA) for 3 min. Then, sections were washed with water, dehydrated in ascending ethanol concentrations (30%, 50%, 70% and 90%) and stained with an alcoholic eosin solution (HT1101116-500ML, SIGMA) for 2 min. Finally, the samples were again treated with increasing concentrations of ethanol (90 and 100%) before a final xylol wash at room temperature. Slides were then mounted with Cytoseal (8311-4, Thermo Scientific).

**High throughput RNA sequencing.** RNA was isolated from pools of three adult male zebrafish (2.5 months) using the RNeasy Minikit (Qiagen #74104) and treated with RNase-free DNase I according to the manufacturer's instructions. RNA concentration was determined using a NanoDrop 2000 (Thermo Fisher Scientific- USA). Duplicates of RNA samples were submitted to Macrogen Next Generation Sequencing Division (Macrogen, Seoul, South Korea) for high throughput sequencing. Libraries were generated using the TruSeq Stranded mRNA LT Sample Prep Kit (Illumina, USA). Sequencing was performed in a NovaSeq 6000 System (Illumina, USA) according to the user guide (Document #1000000019358 v02). Trimmomatic 0.38<sup>77</sup> was used to remove the Illumina adapter sequences and bases with base quality lower than three from the ends. HISAT2 aligner <sup>78</sup> was used to map sequence reads against the zebrafish genome reference (GRCz11). Expression profiles were calculated for each sample as read count and normalization value, which is based of transcript length and depth of coverage. DEG analysis of the myoc KO vs. wild type zebrafish was performed using reads per kilobase of transcript per million mapped reads (RPKM). Genes with a fold change  $\geq 2.0$  and a p-

value < 0.05 in the four possible comparisons of the two biological replicas were considered as DEGs (KO1 vs. WT1, KO1 vs. WT2, KO2 vs. WT1 and KO2 vs WT2).

Functional gene enrichment analysis of DEGs was performed using GO (<http://geneontology.org/>), KEEG (<http://www.kegg.jp/kegg/pathway.html>) databases using the g:Profiler tool (<https://biit.cs.ut.ee/gprofiler/>) and ShinyGO<sup>37</sup>.

**Statistics.** Statistical comparisons between groups were performed using the chi-squared, Fisher's tests or one-way ANOVA. Statistical analysis of the data was performed using the SigmaPlot 12.0 software (Systat Software Inc.).

## Data Availability

All data generated or analysed during this study are included in this published article and its Supplementary Information files.

## References

- 1 Stone, E. M. *et al.* Identification of a gene that causes primary open angle glaucoma. *Science* **275**, 668-670 (1997).
- 2 Quigley, H. A. Ganglion cell death in glaucoma: pathology recapitulates ontogeny. *Aust.N.Z.J.Ophthalmol.* **23**, 85-91 (1995).
- 3 Polansky, J. R. *et al.* Cellular pharmacology and molecular biology of the trabecular meshwork inducible glucocorticoid response gene product. *Ophthalmologica* **211**, 126-139 (1997).
- 4 Kubota, R. *et al.* A novel myosin-like protein (myocilin) expressed in the connecting cilium of the photoreceptor: molecular cloning, tissue expression, and chromosomal mapping. *Genomics* **41**, 360-369 (1997).
- 5 Escribano, J., Ortego, J. & Coca-Prados, M. Isolation and characterization of cell-specific cDNA clones from a subtractive library of the ocular ciliary body of a single normal human donor: transcription and synthesis of plasma proteins. *J.Biochem.(Tokyo)* **118**, 921-931 (1995).
- 6 Ortego, J., Escribano, J. & Coca-Prados, M. Cloning and characterization of subtracted cDNAs from a human ciliary body library encoding TIGR, a protein involved in juvenile open angle glaucoma with homology to myosin and olfactomedin. *FEBS Lett.* **413**, 349-353 (1997).
- 7 Huang, W., Jaroszewski, J., Ortego, J., Escribano, J. & Coca-Prados, M. Expression of the TIGR gene in the iris, ciliary body, and trabecular meshwork of the human eye. *Ophthalmic Genetics* **21**, 155-169 (2000).
- 8 Karali, A., Russell, P., Stefani, F. H. & Tamm, E. R. Localization of myocilin/trabecular meshwork--inducible glucocorticoid response protein in the human eye. *Invest Ophthalmol.Vis.Sci.* **41**, 729-740 (2000).
- 9 Ezzat, M. K. *et al.* Characterization of monoclonal antibodies against the glaucoma-associated protein myocilin. *Exp.Eye Res.* **87**, 376-384 (2008).
- 10 Russell, P., Tamm, E. R., Grehn, F. J., Picht, G. & Johnson, M. The Presence and Properties of Myocilin in the Aqueous Humor. *Invest Ophthalmol.Vis.Sci.* **42**, 983-986 (2001).
- 11 Aroca-Aguilar, J. D., Sanchez-Sanchez, F., Ghosh, S., Coca-Prados, M. & Escribano, J. Myocilin mutations causing glaucoma inhibit the intracellular endoproteolytic cleavage of myocilin between amino acids Arg226 and Ile227. *J.Biol.Chem.* **280**, 21043-21051 (2005).
- 12 Fautsch, M. P. & Johnson, D. H. Characterization of myocilin-myocilin interactions. *Invest Ophthalmol.Vis.Sci.* **42**, 2324-2331 (2001).
- 13 Fautsch, M. P., Vrabel, A. M., Peterson, S. L. & Johnson, D. H. In vitro and in vivo characterization of disulfide bond use in myocilin complex formation. *Mol.Vis.* **10**, 417-425 (2004).
- 14 Aroca-Aguilar, J. D., Fernández-Navarro, A., Ontañón, J., Coca-Prados, M. & Escribano, J. Identification of myocilin as a blood plasma protein and analysis of its role in leukocyte adhesion to endothelial cell monolayers. *PLoS One* **13**, e0209364, doi:10.1371/journal.pone.0209364 (2018).
- 15 Hardy, K. M., Hoffman, E. A., Gonzalez, P., McKay, B. S. & Stamer, W. D. Extracellular trafficking of myocilin in human trabecular meshwork cells. *J.Biol.Chem.* **280**, 28917-28926 (2005).
- 16 Hoffman, E. A., Perkumas, K. M., Highstrom, L. M. & Stamer, W. D. Regulation of myocilin-associated exosome release from human trabecular meshwork cells. *Invest Ophthalmol.Vis.Sci.* **50**, 1313-1318 (2009).

- 17 Gobeil, S., Letartre, L. & Raymond, V. Functional analysis of the glaucoma-causing TIGR/myocilin protein: integrity of amino-terminal coiled-coil regions and olfactomedin homology domain is essential for extracellular adhesion and secretion. *Exp. Eye Res.* **82**, 1017-1029 (2006).
- 18 Stamer, W. D. *et al.* Coiled-coil targeting of myocilin to intracellular membranes. *Exp. Eye Res.* **83**, 1386-1395 (2006).
- 19 Sanchez-Sanchez, F., Martinez-Redondo, F., Aroca-Aguilar, J. D., Coca-Prados, M. & Escribano, J. Characterization of the intracellular proteolytic cleavage of myocilin and identification of calpain II as a myocilin-processing protease. *Journal of Biological Chemistry* **282**, 27810-27824 (2007).
- 20 Anholt, R. R. Olfactomedin proteins: central players in development and disease. *Front Cell Dev Biol* **2**, 6, doi:10.3389/fcell.2014.00006 (2014).
- 21 Donegan, R. K. *et al.* Structural basis for misfolding in myocilin-associated glaucoma. *Hum Mol Genet* **24**, 2111-2124 (2015).
- 22 Hill, S. E. *et al.* Structure and Misfolding of the Flexible Tripartite Coiled-Coil Domain of Glaucoma-Associated Myocilin. *Structure* **25**, 1697-1707.e1695, doi:10.1016/j.str.2017.09.008 (2017).
- 23 Aroca-Aguilar, J.-D., Martinez-Redondo, F., Sanchez-Sanchez, F., Coca-Prados, M. & Escribano, J. Functional Role of Proteolytic Processing of Recombinant Myocilin in Self-Aggregation. *Investigative Ophthalmology & Visual Science* **51**, 72-78 (2010).
- 24 Aroca-Aguilar, J. D. *et al.* Interaction of Recombinant Myocilin with the Matricellular Protein SPARC: Functional Implications. *Invest Ophthalmol Vis. Sci.* **52**, 179-189 (2011).
- 25 Furutani, Y. *et al.* Identification and characterization of photomedins: novel olfactomedin-domain-containing proteins with chondroitin sulphate-E-binding activity. *Biochem. J* **389**, 675-684 (2005).
- 26 Maertens, B. *et al.* Cleavage and oligomerization of gliomedin, a transmembrane collagen required for node of ranvier formation. *J Biol. Chem.* **282**, 10647-10659 (2007).
- 27 Volynski, K. E. *et al.* Latrophilin fragments behave as independent proteins that associate and signal on binding of LTX(N4C). *EMBO J* **23**, 4423-4433 (2004).
- 28 Aroca-Aguilar, J.-D. *et al.* Bicarbonate-Dependent Secretion and Proteolytic Processing of Recombinant Myocilin. *Plos One* **8**, doi:10.1371/journal.pone.0054385 (2013).
- 29 Kwon, H. S., Lee, H. S., Ji, Y., Rubin, J. S. & Tomarev, S. I. Myocilin is a modulator of Wnt signaling. *Mol Cell Biol* **29**, 2139-2154 (2009).
- 30 Shen, X., Ying, H. & Yue, B. Y. Wnt activation by wild type and mutant myocilin in cultured human trabecular meshwork cells. *PLoS One* **7**, e44902, doi:10.1371/journal.pone.0044902 (2012).
- 31 Wentz-Hunter, K., Kubota, R., Shen, X. & Yue, B. Y. Extracellular myocilin affects activity of human trabecular meshwork cells. *J. Cell Physiol* **200**, 45-52 (2004).
- 32 Wentz-Hunter, K., Shen, X., Okazaki, K., Tanihara, H. & Yue, B. Y. Overexpression of myocilin in cultured human trabecular meshwork cells. *Exp. Cell Res.* **297**, 39-48 (2004).
- 33 Brogna, S. & Wen, J. Nonsense-mediated mRNA decay (NMD) mechanisms. *Nat Struct Mol Biol* **16**, 107-113 (2009).
- 34 Parichy, D. M., Elizondo, M. R., Mills, M. G., Gordon, T. N. & Engeszer, R. E. Normal table of postembryonic zebrafish development: staging by externally visible anatomy of the living fish. *Dev Dyn* **238**, 2975-3015 (2009).
- 35 Gustafson, E. A. & Wessel, G. M. Vasa genes: emerging roles in the germ line and in multipotent cells. *Bioessays* **32**, 626-637 (2010).
- 36 Uchida, D., Yamashita, M., Kitano, T. & Iguchi, T. Oocyte apoptosis during the transition from ovary-like tissue to testes during sex differentiation of juvenile zebrafish. *J Exp Biol* **205**, 711-718 (2002).
- 37 Ge, S. X., Jung, D. & Yao, R. ShinyGO: a graphical gene-set enrichment tool for animals and plants. *Bioinformatics* **36**, 2628-2629, doi:10.1093/bioinformatics/btz931 (2020).

- 38 Lau, E. S., Zhang, Z., Qin, M. & Ge, W. Knockout of Zebrafish Ovarian Aromatase Gene (cyp19a1a) by TALEN and CRISPR/Cas9 Leads to All-male Offspring Due to Failed Ovarian Differentiation. *Sci Rep* **6**, 37357, doi:10.1038/srep37357 (2016).
- 39 Nguyen, T. D. *et al.* Gene structure and properties of TIGR, an olfactomedin-related glycoprotein cloned from glucocorticoid-induced trabecular meshwork cells. *J.Biol.Chem.* **273**, 6341-6350 (1998).
- 40 Fingert, J. H. *et al.* Characterization and comparison of the human and mouse GLC1A glaucoma genes. *Genome Res.* **8**, 377-384 (1998).
- 41 Liu, W. *et al.* Olfactomedin 4 down-regulates innate immunity against *Helicobacter pylori* infection. *Proc Natl Acad Sci U S A* **107**, 11056-11061 (2010).
- 42 Kim, B. S. *et al.* Targeted Disruption of the Myocilin Gene (Myoc) Suggests that Human Glaucoma-Causing Mutations Are Gain of Function. *Mol.Cell Biol.* **21**, 7707-7713 (2001).
- 43 Lam, D. S. *et al.* Truncations in the TIGR gene in individuals with and without primary open-angle glaucoma. *Invest Ophthalmol.Vis.Sci.* **41**, 1386-1391 (2000).
- 44 Wilson, C. A. *et al.* Wild sex in zebrafish: loss of the natural sex determinant in domesticated strains. *Genetics* **198**, 1291-1308 (2014).
- 45 Santos, D., Luzio, A. & Coimbra, A. M. Zebrafish sex differentiation and gonad development: A review on the impact of environmental factors. *Aquat Toxicol* **191**, 141-163 (2017).
- 46 Bradley, K. M. *et al.* An SNP-Based Linkage Map for Zebrafish Reveals Sex Determination Loci. *G3 (Bethesda)* **1**, 3-9 (2011).
- 47 Anderson, J. L. *et al.* Multiple sex-associated regions and a putative sex chromosome in zebrafish revealed by RAD mapping and population genomics. *PLoS One* **7**, e40701, doi:10.1371/journal.pone.0040701 (2012).
- 48 Liew, W. C. *et al.* Polygenic sex determination system in zebrafish. *PLoS One* **7**, e34397, doi:10.1371/journal.pone.0034397 (2012).
- 49 Howe, K. *et al.* The zebrafish reference genome sequence and its relationship to the human genome. *Nature* **496**, 498-503 (2013).
- 50 Santos, E. M. *et al.* Molecular basis of sex and reproductive status in breeding zebrafish. *Physiol Genomics* **30**, 111-122 (2007).
- 51 Hosseini, S. *et al.* Genetic mechanism underlying sexual plasticity and its association with colour patterning in zebrafish (*Danio rerio*). *BMC Genomics* **20**, 341, doi:10.1186/s12864-019-5722-1 (2019).
- 52 Webster, K. A. *et al.* Dmrt1 is necessary for male sexual development in zebrafish. *Dev Biol* **422**, 33-46 (2017).
- 53 Yan, Y. L. *et al.* A Hormone That Lost Its Receptor: Anti-Mullerian Hormone (AMH) in Zebrafish Gonad Development and Sex Determination. *Genetics* **213**, 529-553 (2019).
- 54 Ozaki, Y., Saito, K., Shinya, M., Kawasaki, T. & Sakai, N. Evaluation of Sycp3, Plzf and Cyclin B3 expression and suitability as spermatogonia and spermatocyte markers in zebrafish. *Gene Expr Patterns* **11**, 309-315 (2011).
- 55 Miller, W. L. Molecular biology of steroid hormone synthesis. *Endocr Rev* **9**, 295-318 (1988).
- 56 Clark, B. J., Wells, J., King, S. R. & Stocco, D. M. The purification, cloning, and expression of a novel luteinizing hormone-induced mitochondrial protein in MA-10 mouse Leydig tumor cells. Characterization of the steroidogenic acute regulatory protein (StAR). *J Biol Chem* **269**, 28314-28322 (1994).
- 57 Zhang, Q. *et al.* Zebrafish cyp11c1 Knockout Reveals the Roles of 11-ketotestosterone and Cortisol in Sexual Development and Reproduction. *Endocrinology* **161**, doi:10.1210/endocr/bqaa048 (2020).
- 58 Borg, B. Androgens in teleost fishes. *Comp Biochem Physiol C: Pharmacol Toxicol Endocrinol* **109**, 219-245.



- 59 Leerberg, D. M., Sano, K. & Draper, B. W. Fibroblast growth factor signaling is required for early somatic gonad development in zebrafish. *PLoS Genet* **13**, e1006993, doi:10.1371/journal.pgen.1006993 (2017).
- 60 Rodríguez-Marí, A. *et al.* Characterization and expression pattern of zebrafish Anti-Müllerian hormone (Amh) relative to sox9a, sox9b, and cyp19a1a, during gonad development. *Gene Expr Patterns* **5**, 655-667 (2005).
- 61 Wang, X. G., Bartfai, R., Sleptsova-Freidrich, I. & Orban, L. The timing and extent of 'juvenile ovary' phase are highly variable during zebrafish testis differentiation. *Journal of Fish Biology* **70**, 33-44 (2007).
- 62 Sreenivasan, R. *et al.* Gonad differentiation in zebrafish is regulated by the canonical Wnt signaling pathway. *Biol Reprod* **90**, 45, doi:10.1095/biolreprod.113.110874 (2014).
- 63 Xing, Y. Y. *et al.* Mutational analysis of dishevelled genes in zebrafish reveals distinct functions in embryonic patterning and gastrulation cell movements. *PLoS Genet* **14**, e1007551, doi:10.1371/journal.pgen.1007551 (2018).
- 64 Cadigan, K. M. & Waterman, M. L. TCF/LEFs and Wnt signaling in the nucleus. *Cold Spring Harb Perspect Biol* **4**, doi:10.1101/cshperspect.a007906 (2012).
- 65 Tago, K. *et al.* Inhibition of Wnt signaling by ICAT, a novel beta-catenin-interacting protein. *Genes Dev* **14**, 1741-1749 (2000).
- 66 Krupnik, V. E. *et al.* Functional and structural diversity of the human Dickkopf gene family. *Gene* **238**, 301-313 (1999).
- 67 Kossack, M. E. *et al.* Female Sex Development and Reproductive Duct Formation Depend on Wnt4a in Zebrafish. *Genetics* **211**, 219-233 (2019).
- 68 Parakh, T. N. *et al.* Follicle-stimulating hormone/cAMP regulation of aromatase gene expression requires beta-catenin. *Proc Natl Acad Sci U S A* **103**, 12435-12440 (2006).
- 69 Nicol, B. & Guiguen, Y. Expression profiling of Wnt signaling genes during gonadal differentiation and gametogenesis in rainbow trout. *Sex Dev* **5**, 318-329 (2011).
- 70 Amberg, J. J., Goforth, R. R. & Sepulveda, M. S. Antagonists to the Wnt cascade exhibit sex-specific expression in gonads of sexually mature shovelnose sturgeon. *Sex Dev* **7**, 308-315 (2013).
- 71 Vainio, S., Heikkila, M., Kispert, A., Chin, N. & McMahon, A. P. Female development in mammals is regulated by Wnt-4 signalling. *Nature* **397**, 405-409 (1999).
- 72 Meeker, N. D., Hutchinson, S. A., Ho, L. & Trede, N. S. Method for isolation of PCR-ready genomic DNA from zebrafish tissues. *Biotechniques* **43**, 610, 612, 614 (2007).
- 73 Morales-Camara, S. *et al.* Role of GUCA1C in Primary Congenital Glaucoma and in the Retina: Functional Evaluation in Zebrafish. *Genes (Basel)* **11**, doi:10.3390/genes11050550 (2020).
- 74 Livak, K. J. & Schmittgen, T. D. Analysis of relative gene expression data using real-time quantitative PCR and the 2<sup>-</sup>(Delta Delta C(T)) Method. *Methods* **25**, 402-408 (2001).
- 75 Ferre-Fernández, J. J. *et al.* Whole-Exome Sequencing of Congenital Glaucoma Patients Reveals Hypermorphic Variants in GPATCH3, a New Gene Involved in Ocular and Craniofacial Development. *Sci Rep* **7**, 46175, doi:10.1038/srep46175 (2017).
- 76 Bonet-Fernández, J. M. *et al.* CPAMD8 loss-of-function underlies non-dominant congenital glaucoma with variable anterior segment dysgenesis and abnormal extracellular matrix. *Hum Genet*, doi:10.1007/s00439-020-02164-0 (2020).
- 77 Bolger, A. M., Lohse, M. & Usadel, B. Trimmomatic: a flexible trimmer for Illumina sequence data. *Bioinformatics* **30**, 2114-2120 (2014).
- 78 Kim, D., Langmead, B. & Salzberg, S. L. HISAT: a fast spliced aligner with low memory requirements. *Nat Methods* **12**, 357-360 (2015).

## Acknowledgements

This research was funded by research grants from the “Instituto de Salud Carlos III/European Regional Development Fund (ERDF)” (PI15/01193, PI19/00208 and RD16/0008/0019, OFTARED), the Regional Ministry of Science and Technology of the Board of the Communities of “Castilla-La Mancha” (SBPLY/17/180501/000404; <http://www.educa.jccm.es/idiuniv/es>) and research funds from Universidad de Castilla-La Mancha (2019-GRIN-26945). SA-M was sponsored by the Regional Ministry of Science and Technology of the Board of the Communities of “Castilla-La Mancha” (PREJCCM2016/28). We would like to thank Mr. José-Ramón Marín-Tebar for excellent microscopy technical assistance and American Manuscript Editors for English proofreading.

## Author Contributions

J.E., J.-D.A.-A. and J.-J.F.-F. conceived the experiments. R.A.-A, J.-D.A.-A., S.A.-M., J.-J. F.-F., J.-M.B.-F., and M.-J.C.-V. conducted the experiments. R.A.-A, J.-D.A.-A., and J.E. analysed the data. J.E. wrote the manuscript. All authors read and approved the manuscript.

## Additional information

Supplementary information accompanies this paper at <http://www.nature.com/srep>.

Correspondence and requests for materials should be addressed to J.E.

The authors declare no competing interests.

## Figure legends

**Figure 1. Generation and molecular characterisation of a *myoc* KO zebrafish line using CRISPR/Cas9 genome editing.** (A) Localisation of the crRNA designed to target *myoc* exon 1. The PAM sequence is indicated on a green background. Red and blue nucleotides indicate deleted and inserted nucleotides identified in mutant fishes used to establish the KO line, respectively. (B) Stepwise procedure that was followed to establish the KO line. F0 animals were raised to adulthood, crossed with wild-type AB zebrafish and the offspring was genotyped by PAGE to identify germline transmission of *myoc* deletions (F0 founders). F0 founders were crossed with wild-type AB animals to obtain mutant F1 heterozygotes that were further outbred to segregate off-targets mutations and to obtain the F2 generation. F2 heterozygotes were inbred to produce the F3 generation. The Biorender tool was used to create this scheme. (C) Genotyping of a *myoc* indel using 8% PAGE. Three representative samples are shown. White arrowhead: wild-type allele (265 bp). Black arrowhead: mutant allele (275 bp). (D) Sanger sequencing of the selected *myoc* mutation. The arrow in the electropherogram indicate the nucleotide where the mutation starts. Blue and red letters indicate inserted (14 bp) and deleted (4 bp) nucleotides, respectively. (E) Decreased *myoc* mRNA levels in *myoc* mutant zebrafish (+/- and -/-). mRNA levels in pools of 15 F3 zebrafish larvae (144 hpf) were measured by qRT-PCR. The results are expressed as relative expression levels and normalised to control wild-type (+/+) larvae. Values represent the average of three different experiments. Asterisks indicate statistical significance compared to +/+.

\*p=0.00017. \*\*p=00051.

**Figure 2. Fluorescent whole-mount immunohistochemical detection of myocilin in the eye of zebrafish embryos (96hpf).** Wild-type (A–C), heterozygous (D–F), and homozygous (G–I) *myoc* mutant embryos were incubated with a chicken anti-myocilin (TNT) primary antibody and a Cy2-conjugated goat anti-chicken IgY secondary antibody. Three-dimensional reconstruction from z-stack scanned confocal microscopy images (A, D and G) of the eye. Optical sections (92  $\mu\text{m}$ ) 8 (B, E and H) and 16 (C, F and I), from the exterior ocular surface, were selected from z-stack images to show the precise localisation of the green signal in the external and internal surface of the optic cup (white arrows and yellow arrowheads, respectively), lens epithelium (white arrowhead), and dorsoposterior and ventral periocular tissues (yellow arrowheads) (A–C). Blue: DAPI nuclear staining. Green: Cy2-conjugated goat anti-chicken IgY secondary antibody. Red: tissue autofluorescence. The cross indicates the position of the embryonic axes (D: dorsal; P: posterior; V: ventral; A: anterior). The image is representative of the result observed in 10 embryos. L: lens. R: retina. The negative control is shown in Supplementary Fig. S3A–C online. Two-dimensional confocal image z-stacks are shown in supplementary video 1.

**Figure 3. Fluorescent whole-mount immunohistochemical detection of myoc in the yolk of zebrafish larvae (96hpf).** Wild-type (A–C), heterozygous (D–F) and homozygous (G–I) *myoc* mutant embryos were incubated with chicken anti-myocilin (TNT) primary antibody and a Cy2-conjugated goat anti-chicken IgY secondary antibody. Three-dimensional reconstruction from z-stack scanned confocal microscopy images (A, D and G) of the yolk. Sections (92  $\mu\text{m}$ ) 8 (B, E and H) and 16 (C, F and I), were selected from z-

stack images to show the precise localisation of the green signal between the yolk's surface (arrows) (A–C). Blue: DAPI nuclear staining. Green: Cy2-conjugated goat anti-chicken IgY secondary antibody. Red: tissue autofluorescence. The cross indicates the position of the embryonic axes (D: dorsal; P: posterior; V: ventral; A: anterior). The image is representative of the result observed in 10 embryos. The negative control is shown in Supplementary Fig. S3D-F online. Two-dimensional confocal image z-stacks are shown in supplementary video 2.

**Figure 4. Fluorescent whole-mount immunohistochemical detection of myoc in the tail of zebrafish embryos (96hpf).** Wild-type (A–C), heterozygous (D–F) and homozygous (G–I) *myoc* mutant embryos were incubated with chicken anti-myocilin (TNT) primary antibody and a Cy2-conjugated goat anti-chicken IgY secondary antibody. Three-dimensional reconstruction from z-stack scanned confocal microscopy images (A, D, and G) of the tail. Sections (92  $\mu\text{m}$ ) 8 (B, E, and H) and 16 (C, F, and I) were selected from z-stack images to show the precise localisation of the green signal in the tail's skin (arrow) (A–C). Blue: DAPI nuclear staining. Green: Cy2-conjugated goat anti-chicken IgY secondary antibody. Red: tissue autofluorescence. The cross indicates the position of the embryonic axes (D: dorsal; P: posterior; V: ventral; A: anterior). The image is representative of the result observed in ten embryos. The negative control is shown in Supplementary Fig. S3G-I online.

**Figure 5. Immunohistochemistry of myocilin in ocular structures of adult zebrafish.**

Fluorescent immunohistochemistry of iridocorneal dorsal angle (A and E), cornea (B and

F) and retina (C, D, and G) sections (14  $\mu\text{m}$ ) of wild-type and KO *myoc* adult zebrafish (7 months). Samples were incubated with an anti-myocilin primary antibody (TNT), followed by Cy2-conjugate goat anti-chicken IgY secondary antibody (green signals). The TNT antibody recognises the N-terminal part of myocilin protein. Expression is seen in the non-pigmented epithelium of the ciliary body and in the stroma and iris vessels (A), in the corneal endothelium (B), in ganglion cell layer in the retina (C and D) (arrowhead) in wild-type. Red signals correspond to tissue autofluorescence and blue signals correspond to DAPI nuclear staining. AL: annular ligament. NPE: non-pigmented ciliary epithelium; IBV: iris blood vessels; IS: iris stroma. CEP: cornea epithelium; CS: stroma; CE: cornea endothelium GCL: ganglion cell layer; IPL: inner plexiform layer; INL; inner nuclear layer; OPL: outer plexiform layer; ONL; outer nuclear layer; PHL: photoreceptor layer. R: retina+/+: wild-type; -/-: *myoc* KO. The negative control is shown in Supplementary Fig. S4 online.

### **Figure 6. Immunohistochemistry of myocilin in non-ocular tissues of adult zebrafish.**

Wild-type and *myoc* KO adult (7 months) zebrafish tissue sections (14 $\mu\text{m}$ ) were incubated with a chicken anti-myocilin (TNT) primary antibody and a Cy2-conjugate goat anti-chicken IgY secondary antibody. Arrows show immunostaining in the periphery of pharyngeal muscular fibres (A B and G-H), the enterocyte apical side in the intestinal bulb (C-D and I-J) and in the brush border of the epithelial cells in the middle intestine (E-F and K-L). Red signals correspond to tissue autofluorescence. BB: brush border. The images are representative of the result observed in three tissue sections from three



animals. +/+ : wild-type; -/- : *myoc* KO. Negative controls are shown in Supplementary Fig. S5 online.

**Figure 7. Immunohistochemical detection of *myoc* in the reproductive system of adult zebrafish.** Tissue sections (14 $\mu$ m) of adult (7 months) wild-type ovary (A and B) and testis (C and D) and KO *myoc* testis (E and F) were incubated with an anti-myocilin (TNT) primary antibody, followed by Cy2-conjugate goat anti-chicken IgY secondary antibody (green signals). Note that ovaries from -/- animals were not available because of the absence of females with this genotype. White and yellow arrows indicate alveoli-and follicular epithelium-associated immunoreactivity, respectively. White arrowheads show immunolabeling in the seminiferous epithelium (C and D). Red signals correspond to tissue autofluorescence. The images are representative of the result observed in three tissue sections from three animals. +/+ : wild-type; -/- : *myoc* KO. Negative controls are shown in Supplementary Fig. S6 online.

**Figure 8. Absence of females among *myoc* KO zebrafish.** Eight +/- *myoc* siblings were mated, and 30–35 embryos per cross were randomly selected (n=256), raised to adulthood and genotyped by PAGE. The sex ratio as a function of the *myoc* genotype was calculated (A). Observed genotype proportions (B) and embryo survival (C). Values are expressed as the mean  $\pm$  standard error of the mean (SEM). Asterisks indicate statistical significance compared to +/+. \*p=0.00038. \*\*p=0.00001. +/+ : wild-type; -/- : *myoc* KO.

**Figure 9. Myocilin expression and apoptosis analysis in the immature (8 dpf and 28 dpf)**

**gonad of zebrafish KO for *myoc*.** Immunohistochemistry was carried out on two

consecutive tissue sections (upper left insert in panel A) of 8 dpf larvae (A-H).

Immunolabeling against the germ cell marker vasa was used to identify the gonadal

tissue using section two of wild type (+/+) and KO (-/-) larvae (green, A-B and E-F). Areas

indicated by yellow rectangles in (A) and (E) are magnified in (B) and (F), respectively.

Tissue section one was incubated with an anti-myocilin (TNT) primary antibody,

followed by Cy2-conjugate goat anti-chicken IgY secondary antibody (green signals, C-D

and G-H). Immunohistochemistry and apoptosis analysis was also performed on three

consecutive tissue sections (2 to 4, upper left insert in panel I) of juvenile zebrafish (28

dpf) (I-P). Vasa immunolabeling was carried out on section two (green, I-J and M-N).

Areas indicated by yellow rectangles in (I) and (M) are magnified in (J) and (N),

respectively. Tissue section three was incubated with an anti-myocilin (TNT) antibody

(green signals) to localise myocilin expression (K and O). Apoptosis was assessed in

tissue section four using terminal dUTP nick-end labeling (TUNEL) of fragmented DNA (L

and P). Arrows in (D) and (K) and arrowheads in (D) indicate myocilin immunoreactivity.

Arrows and arrowheads in P indicate TUNEL-positive cells in gonadal tissue and in the

outer intestinal wall, respectively. Blue and red signals correspond to DAPI nuclear

staining and tissue autofluorescence, respectively. G: gonad. I: intestine. K: kidney. SB:

swimbladder. The vertical double arrow in (A and I) indicate de dorsoventral axis (D:

dorsal; V: ventral). The images are representative of the results observed in four fishes

of each genotype. Immunohistochemistry negative controls of the larvae germinal

tissue were carried out with tissue sections obtained from a different individual (larvae

2) and are shown in Supplementary Figure S11A and B online. Negative controls of the

juvenile gonad are shown in Supplementary Fig. S11 online (tissue sections five to seven). Section one from juvenile fishes was employed for hematoxylin-eosin staining (Supplementary Fig. S10A-D online).

**Figure 10. Top-50 DEGs in *myoc* KO male versus wild type male zebrafish.** Down- (A) and upregulated (B) genes identified by high throughput RNA sequencing with significant differences in the four comparisons (KO1 vs. WT1, KO1 vs. WT2, KO2 vs. WT1 and KO2 vs. WT2). The golden background indicates genes that were analysed by qRT-PCR. Confirmation by qRT-PCR of differential gene expression of selected down- (C) and upregulated (D) genes.

## Figures

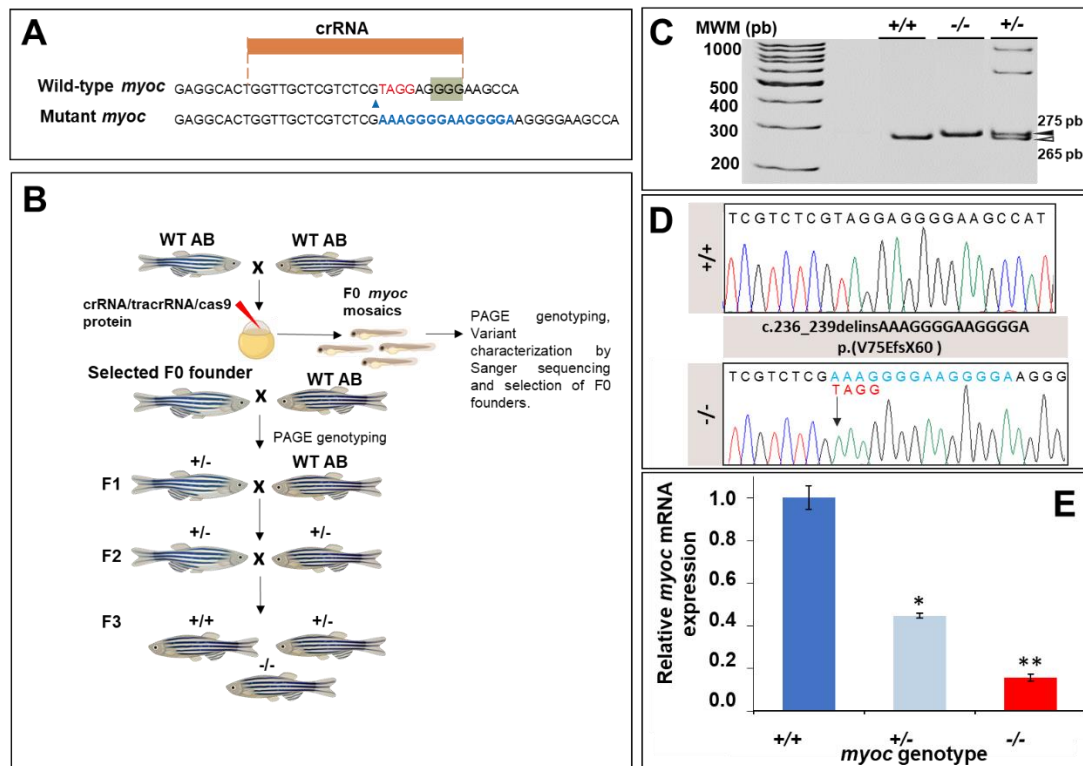

Figure 1.

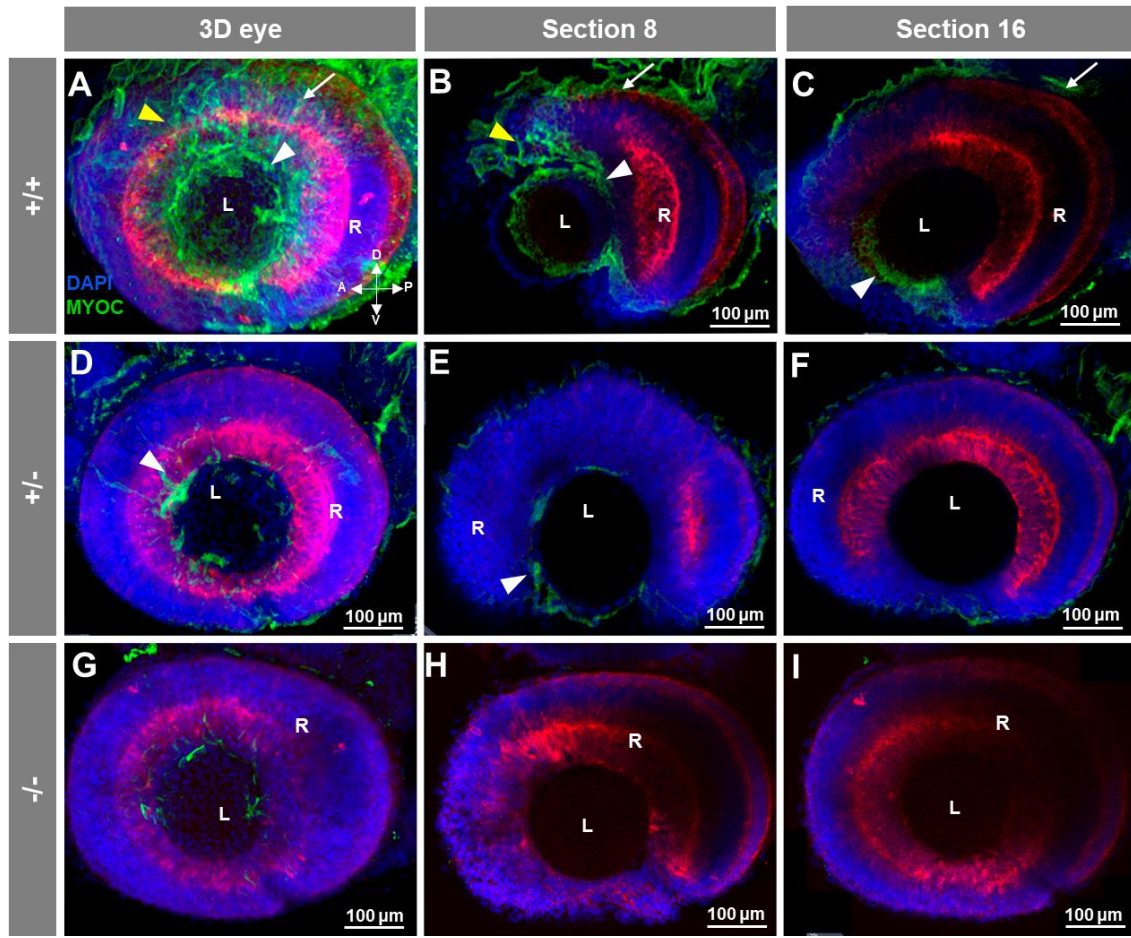

Figure 2

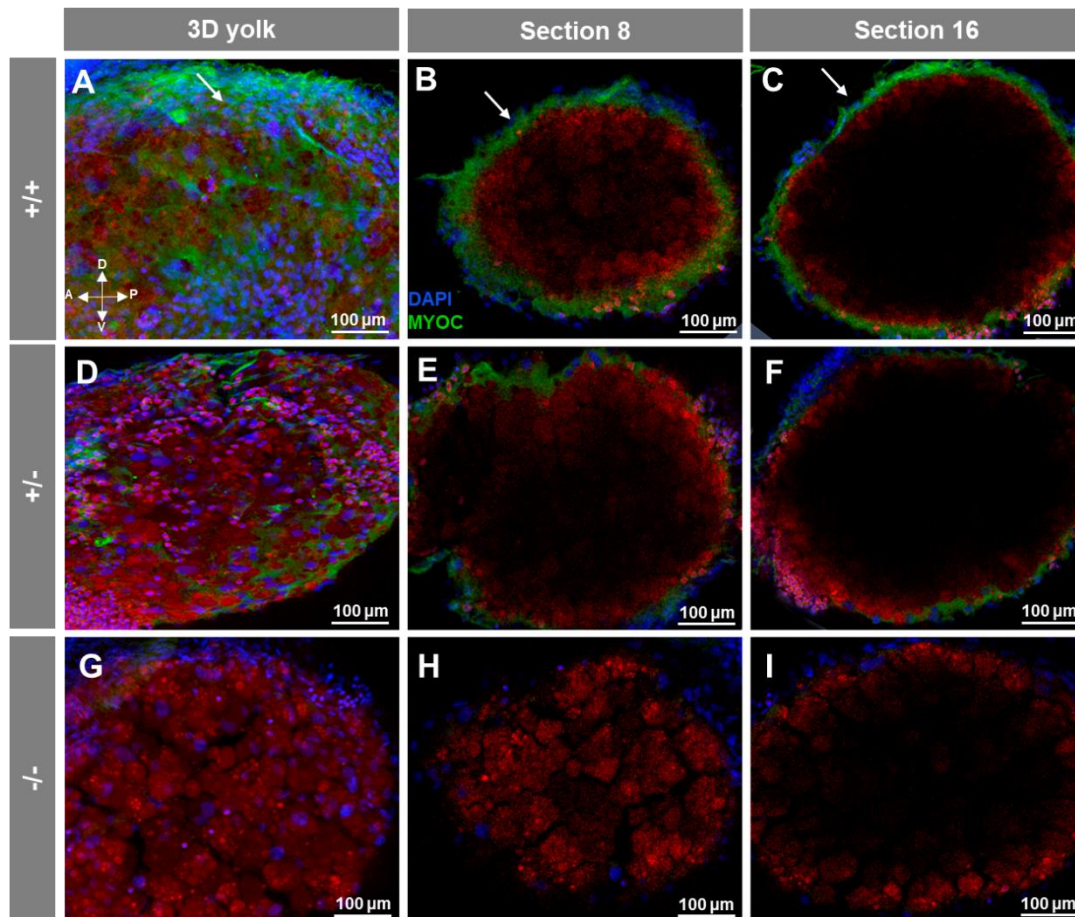

Figure 3

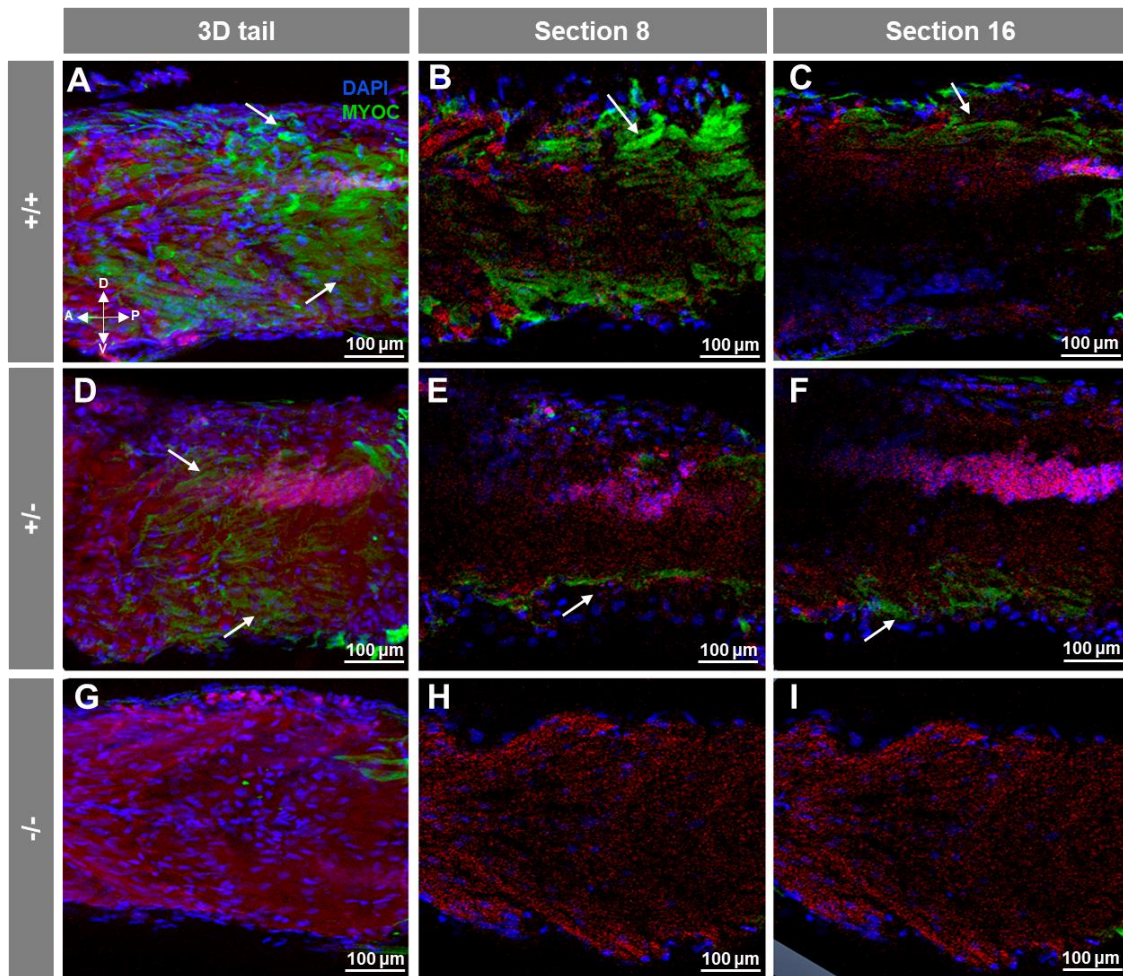

Figure 4

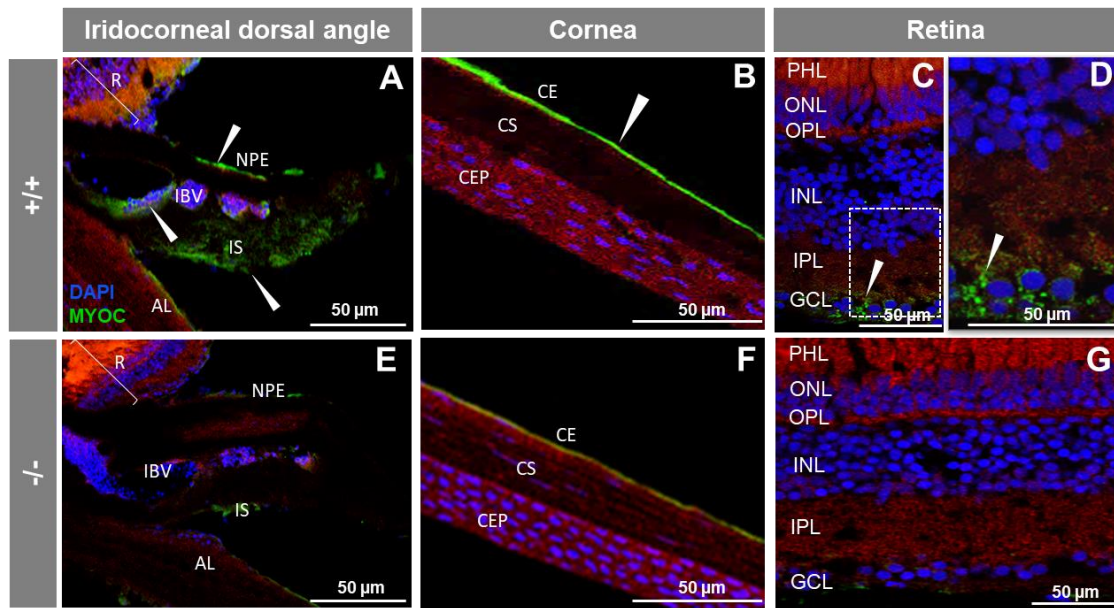

Figure 5



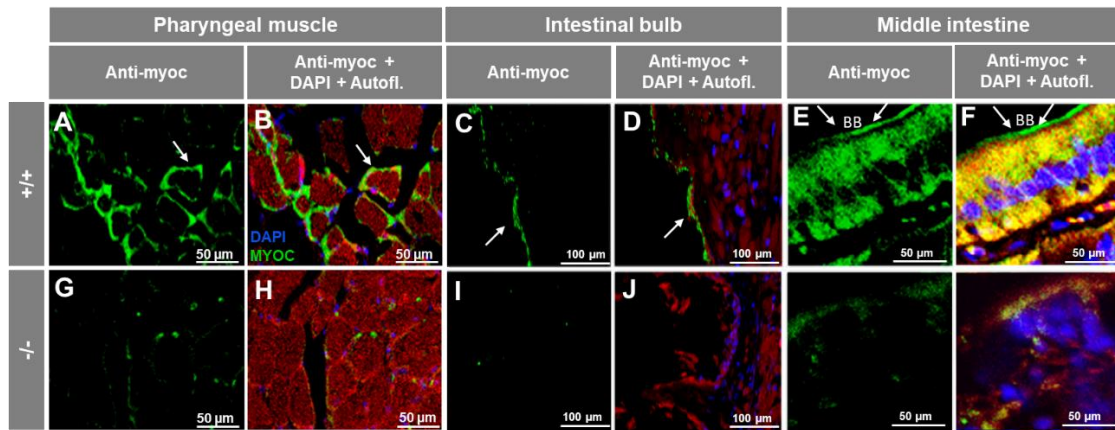

Figure 6

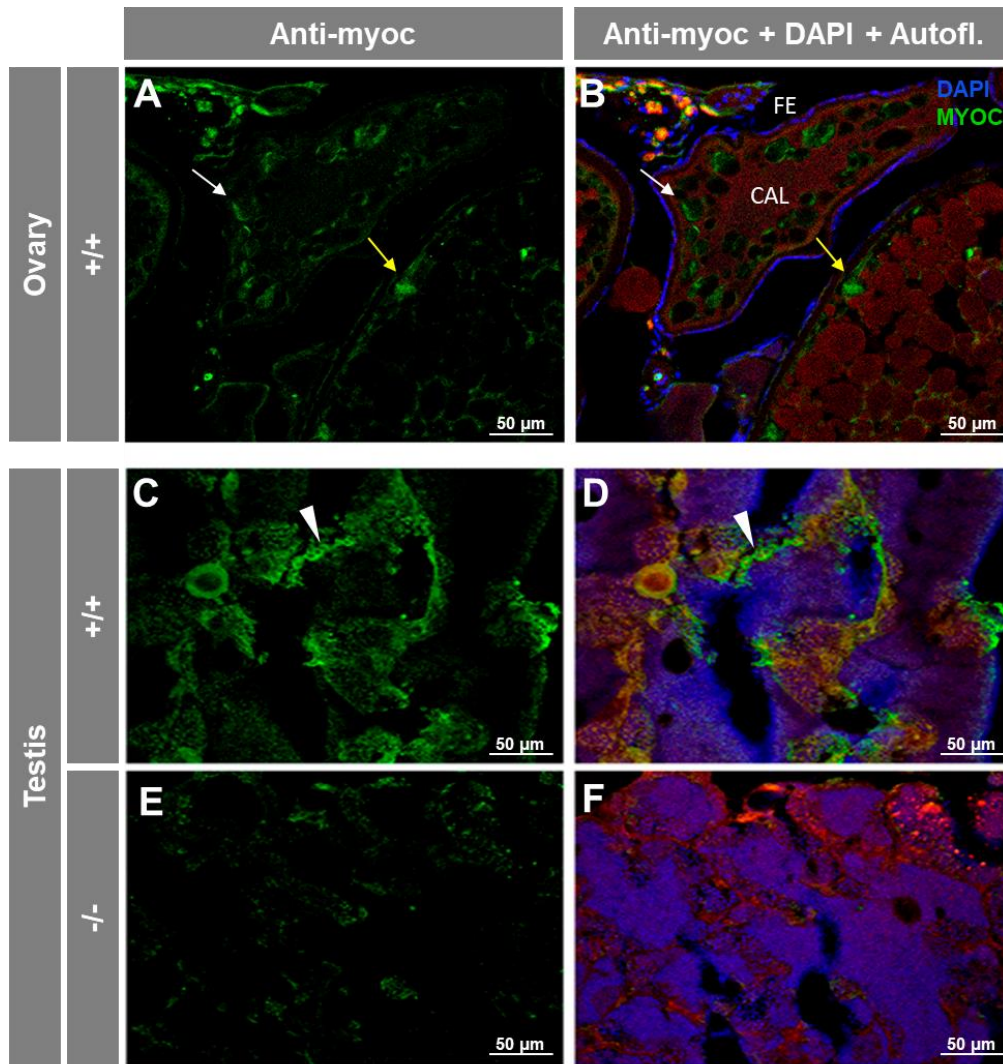

Figure 7

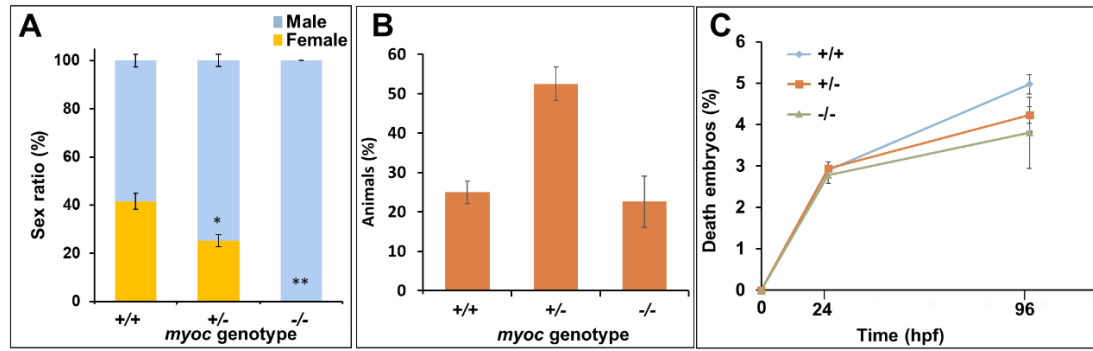

Figure 8

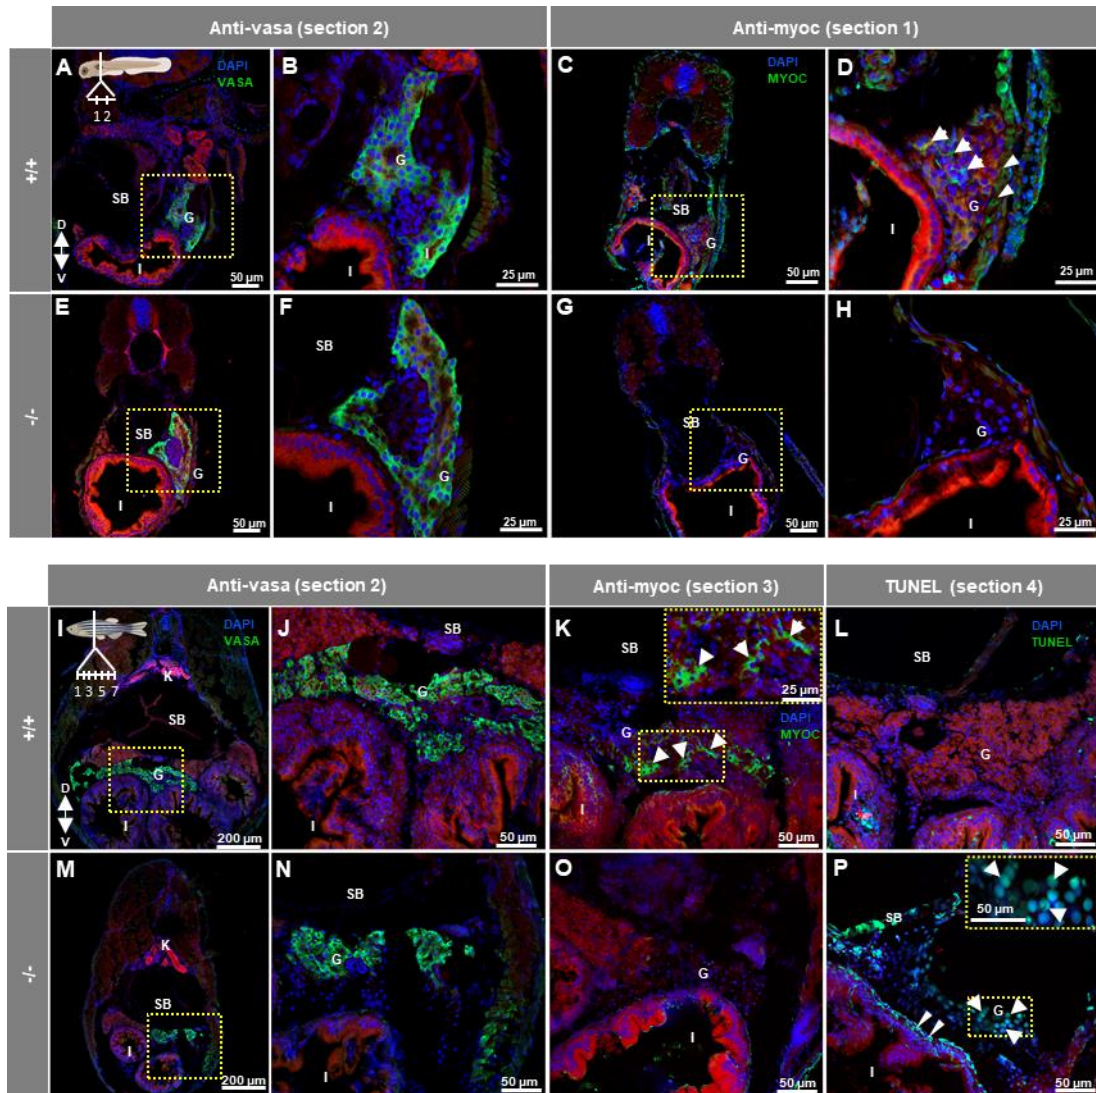

Figure 9

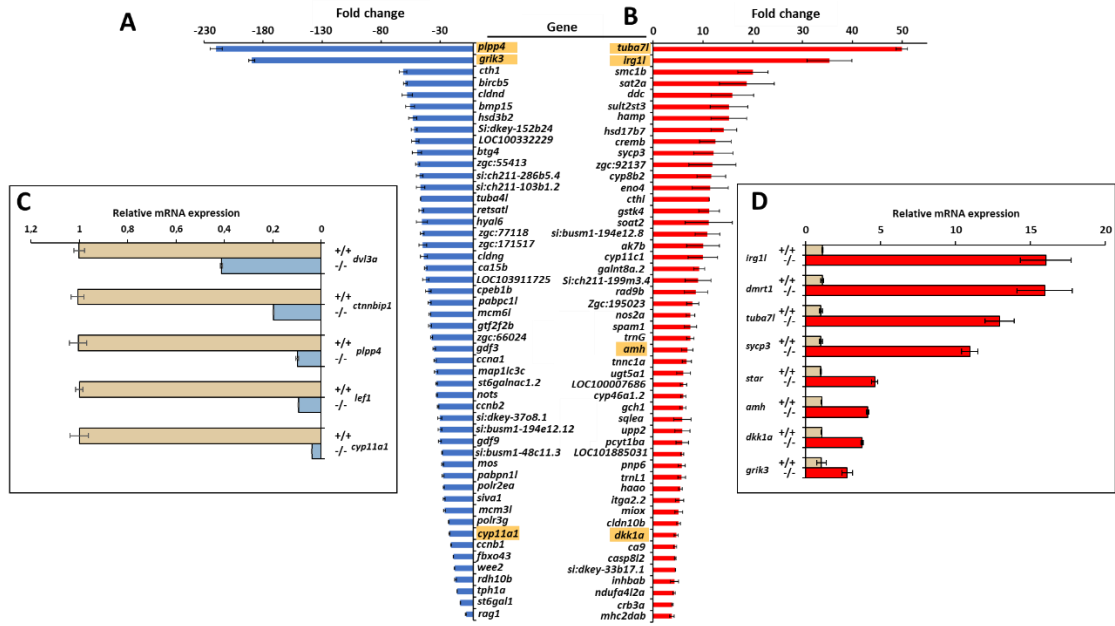

Figure 10
